# Supplementary material for: Subjective and Objective Cognitive Impairments in Non-Hospitalized Persons 9 Months after SARS-CoV-2 Infection
Source: MDPI journal article supplement (doi:10.3390/v15010256), 2023-01-16
Supplement: s1 [file s1]

Table S3: Multivariable linear regression models for the cognitive tests (with acute symptoms as covariables)

|                               | WAIS-IV |               |         | RWT    |                |         | SCWT - W |              |         | SCWT - C |               |         | SCWT - CW |               |         |
|-------------------------------|---------|---------------|---------|--------|----------------|---------|----------|--------------|---------|----------|---------------|---------|-----------|---------------|---------|
| Adjusted R <sup>2</sup>       | 0.09    |               |         | 0.13   |                |         | 0.14     |              |         | 0.02     |               |         | 0.04      |               |         |
| Variable                      | β       | 95% CI        | p-value | β      | 95% CI         | p-value | β        | 95% CI       | p-value | β        | 95% CI        | p-value | β         | 95% CI        | p-value |
| Age                           | -0.00   | -0.02 – 0.02  | 0.9632  | 0.71   | 0.48 – 0.94    | <0.0001 | 0.17     | 0.12 – 0.22  | <0.0001 | 0.05     | -0.02 – 0.11  | 0.1782  | 0.06      | 0.01 – 0.11   | 0.0273  |
| Female sex                    | -0.65   | -1.13 - -0.17 | 0.0079  | 2.50   | -4.19 – 9.19   | 0.4629  | 0.27     | -1.18 – 1.70 | 0.7168  | 1.42     | -0.50 – 3.33  | 0.1456  | 1.94      | 0.43 – 3.45   | 0.0120  |
| School education<br>≤ 9 years | -1.41   | -2.06 - -0.77 | <.0001  | -16.82 | -25.75 - -7.89 | 0.0002  | -3.22    | -5.14 - 1.30 | 0.0011  | -2.83    | -5.38 - -0.28 | 0.0296  | -1.97     | -3.98 - -0.04 | 0.0549  |
| Follow-up time                | 0.04    | -0.04 – 0.11  | 0.3305  | 0.91   | -0.11 – 1.94   | 0.0814  | -0.08    | -0.30 -0.14  | 0.4692  | -0.23    | -0.53 – 0.06  | 0.1162  | -0.09     | -0.32 – 0.15  | 0.4681  |
| Sum of<br>complaints          | 0.10    | -0.03 – 0.17  | 0.0076  | -0.14  | -1.16 – 0.87   | 0.7800  | -0.11    | -0.33 -0.11  | 0.3267  | -0.06    | -0.35 – 0.26  | 0.7099  | -0.18     | -0.41 – 0.05  | 0.1333  |
| Concentr.<br>Problems         | -0.50   | -1.31 – 0.32  | 0.2297  | -5.25  | -16.57 – 6.06  | 0.3616  | -0.43    | -2.85 – 2.00 | 0.7251  | -1.68    | -4.88 – 1.53  | 0.3045  | 0.08      | -2.46 – 2.61  | 0.9519  |
| Memory problems               | -0.37   | -1.17 – 0.43  | 0.3612  | 5.83   | -5.27 – 16.93  | 0.3020  | 0.95     | -1.42 – 3.33 | 0.4301  | 0.45     | -2.70 – 3.60  | 0.7786  | -0.68     | -3.17 – 1.81  | 0.5901  |
| Depression (PHQ-<br>9)        | 0.03    | -0.07 – 0.13  | 0.5380  | 1.39   | 0.02 – 2.77    | 0.0476  | 0.25     | -0.04 – 0.25 | 0.0071  | 0.48     | 0.08 – 0.88   | 0.0197  | 0.32      | 0.01 – 0.64   | 0.0455  |
| Mental HRQOL<br>(VR-12)       | 0.03    | -0.01 – 0.06  | 0.1244  | 0.52   | 0.03 – 1.02    | 0.0398  | 0.15     | 0.03 – 0.25  | 0.0113  | 0.13     | -0.01 – 0.28  | 0.0716  | 0.09      | -0.03 – 0.20  | 0.1363  |
| PTSD (IES-R)                  | -0.17   | -0.41 – 0.08  | 0.1825  | -3.76  | -7.19 - -0.33  | 0.0317  | -0.51    | -1.25 – 0.23 | 0.1739  | -0.51    | -1.49 – 0.46  | 0.3016  | -0.54     | -1.31 – 0.23  | 0.1710  |

|                                   |       |              |        |       |               |        |       |              |        |       |              |        |       |              |        |
|-----------------------------------|-------|--------------|--------|-------|---------------|--------|-------|--------------|--------|-------|--------------|--------|-------|--------------|--------|
| Disturbance of smell <sup>1</sup> | -0.10 | -0.84 – 0.64 | 0.7878 | 1.86  | -8.46 – 12.19 | 0.7231 | 0.95  | -1.28 – 3.19 | 0.4023 | 1.75  | -1.21 – 4.71 | 0.2449 | 2.48  | 0.14 – 4.81  | 0.0380 |
| Disturbance of taste <sup>1</sup> | 0.17  | -0.56 – 0.91 | 0.6397 | -3.74 | -13.92 – 6.45 | 0.4710 | -0.03 | -2.24 – 2.17 | 0.9754 | -0.98 | -3.90 – 1.94 | 0.5106 | -1.98 | -4.29 – 0.33 | 0.0928 |
| Headache <sup>1</sup>             | 0.49  | -0.03 – 1.01 | 0.0645 | 3.83  | -3.44 – 11.09 | 0.9873 | -0.44 | -1.99 – 1.12 | 0.5793 | -0.05 | -2.11 – 2.02 | 0.9639 | 0.39  | -1.24 – 2.02 | 0.6381 |
| Vertigo <sup>1</sup>              | -0.18 | -0.70 – 0.34 | 0.4908 | -4.38 | -11.59 – 2.83 | 0.2330 | -0.30 | -1.85 – 1.25 | 0.7046 | -0.97 | -3.04 – 1.09 | 0.3541 | -0.47 | -2.10 – 1.16 | 0.5712 |
| Sleep problems <sup>1</sup>       | -0.29 | -0.84 – 0.27 | 0.3075 | -1.76 | -9.44 – 5.93  | 0.6530 | 0.07  | -1.60 – 1.73 | 0.9375 | -1.45 | -3.66 – 0.76 | 0.1974 | -0.64 | -2.38 – 1.11 | 0.4746 |

---

WAIS-IV: Wechsler Adult Intelligence Scale; RWT: Regensburger Wortflüssigkeitstest (verbal fluency); SCWT: Stroop Color and Word Test - word (W), color (C), color – words (CW); CI: Confidence interval; PHQ-9: Patient Health Questionnaire; HRQOL: Health-related quality of life; VR-12: Veterans RAND 12-Item Health Survey, Mental Summary Scale; PTSD: Post-traumatic Stress Disorder; IES-R: Impact of Event Scale revised

<sup>1</sup>During the acute COVID-19 phase
