# Supplementary material for: Subjective and Objective Cognitive Impairments in Non-Hospitalized Persons 9 Months after SARS-CoV-2 Infection
Source: MDPI journal article supplement (doi:10.3390/v15010256), 2023-01-16
Supplement: s1 [file s1]

**Table S2.** Multivariable logistic regression models for the dependent variables concentration problems and memory problems at follow-up.

| Variable                                     | Ref.      | Concentration problems |              |         | Memory problems |              |         |
|----------------------------------------------|-----------|------------------------|--------------|---------|-----------------|--------------|---------|
|                                              |           | OR                     | 95% CI       | p-value | OR              | 95% CI       | p-value |
| Age                                          |           | 0.97                   | 0.94 – 0.99  | 0.0142  | 0.99            | 0.96 – 1.01  | 0.2803  |
| Female sex                                   | male      | 1.00                   | 0.45 – 2.24  | 0.9946  | 0.94            | 0.44 – 2.01  | 0.8782  |
| School education<br>≤ 9 years                | > 9 years | 2.20                   | 0.80 – 6..05 | 0.1287  | 1.53            | 0.58 – 4.03  | 0.3857  |
| Follow-up time                               |           | 1.00                   | 0.88 – 1.13  | 0.9431  | 1.06            | 0.94 – 1.18  | 0.3399  |
| Sum of<br>complaints                         |           | 1.59                   | 1.38 – 1.85  | <.0001  | 1.32            | 1.17 – 1.48  | <.0001  |
| Concentration<br>problems <sup>1</sup> (yes) | no        | 11.81                  | 4.75 – 29.32 | <.0001  | -               | -            | -       |
| Memory<br>problems <sup>1</sup> (yes)        | no        | -                      | -            | -       | 7.09            | 3.22 – 15.61 | <.0001  |
| Depression<br>(PHQ-9)                        |           | 1.15                   | 1.00 – 1.33  | 0.0452  | 1.25            | 1.09 – 1.44  | 0.0010  |
| Mental HRQOL<br>(VR-12)                      |           | 1.00                   | 1.00 – 1.05  | 0.9706  | 1.03            | 0.98 – 1.08  | 0.2432  |
| PTSD (IES-R)                                 |           | 0.93                   | 0.65 – 1.33  | 0.7063  | 0.92            | 0.66 – 1.28  | 0.6164  |
| Disturbance of<br>smell (yes)                | no        | 0.23                   | 0.07 – 0.78  | 0.0186  | 0.33            | 0.10 – 1.02  | 0.0546  |
| Disturbance of<br>taste (yes)                | no        | 1.46                   | 0.45 – 4.76  | 0.5338  | 2.11            | 0.69 – 6.42  | 0.1887  |
| Headache (yes)                               | no        | 0.94                   | 0.39 – 2.29  | 0.8932  | 0.56            | 0.24 – 1.34  | 0.1949  |
| Vertigo (yes)                                | no        | 0.62                   | 0.18 – 2.16  | 0.4562  | 1.08            | 0.34 – 3.49  | 0.8935  |
| Sleep problems<br>(yes)                      | no        | 0.49                   | 0.18 – 1.33  | 0.1620  | 0.72            | 0.29 – 1.76  | 0.4684  |

OR: Odds Ratio; CI: Confidence interval; PHQ-9: Patient Health Questionnaire; HRQOL: Health-related quality of life; VR-12: Veterans RAND 12-Item Health Survey, Mental Summary Scale; PTSD: Post-traumatic Stress Disorder; IES-R: Impact of Event Scale revised; <sup>1</sup> acute COVID-19 phase.
