# Supplementary material for: Subjective and Objective Cognitive Impairments in Non-Hospitalized Persons 9 Months after SARS-CoV-2 Infection
Source: MDPI journal article supplement (doi:10.3390/v15010256), 2023-01-16
Supplement: s1 [file s1]

**Table S1.** Multivariable linear regression models for the cognitive tests WAIS-IV, RWT, SCWT - W, SCWT - C and SCWT - CW.

| Adjusted R <sup>2</sup>    | WAIS-IV |               |         | RWT    |                |         | SCWT - W |               |         | SCWT - C |               |         | SCWT - CW |               |         |
|----------------------------|---------|---------------|---------|--------|----------------|---------|----------|---------------|---------|----------|---------------|---------|-----------|---------------|---------|
|                            | β       | 95% CI        | P-value | β      | 95% CI         | P-value | β        | 95% CI        | P-value | β        | 95% CI        | P-value | β         | 95% CI        | P-value |
| Age                        | -0.01   | -0.02 – 0.01  | 0.7738  | 0.71   | 0.48 – 0.94    | <0.0001 | 0.16     | 0.12 – 0.21   | <0.0001 | 0.04     | -0.03 – 0.11  | 0.2279  | 0.05      | 0.01 – 0.11   | 0.0398  |
| Female sex                 | -0.62   | -1.10 – -0.13 | 0.0125  | 3.02   | -3.72 – 9.75   | 0.3787  | 0.18     | -1.27 – 1.62  | 0.8105  | 1.34     | -0.59 – 3.27  | 0.1726  | 1.97      | 0.46 – 3.49   | 0.0108  |
| School education ≤ 9 years | -1.38   | -2.02 – -0.74 | <.0001  | -17.17 | -26.13 – -8.20 | 0.0002  | -3.10    | -5.02 – -1.18 | 0.0016  | -2.81    | -5.37 – -0.26 | 0.0311  | -2.14     | -4.14 – -0.13 | 0.0370  |
| Follow-up time             | 0.04    | -0.04 – 0.11  | 0.3316  | 0.93   | -0.10 – 1.96   | 0.0777  | -0.06    | -0.29 – 0.16  | 0.5698  | -0.19    | -0.49 – 0.10  | 0.1999  | -0.05     | -0.29 – 0.18  | 0.6417  |
| Sum of complaints          | 0.07    | -0.02 – 0.17  | 0.1256  | 0.07   | -1.22 – 1.36   | 0.9196  | -0.23    | -0.51 – 0.05  | 0.1030  | -0.12    | -0.49 – 0.25  | 0.5184  | -0.28     | -0.57 – 0.01  | 0.0560  |
| Concentr. Problems         | -0.47   | -1.29 – 0.36  | 0.2706  | -6.81  | -18.33 – 4.71  | 0.2458  | -0.15    | -2.61 – 2.31  | 0.9046  | -1.76    | -5.03 – 1.51  | 0.2904  | 0.38      | -2.19 – 2.95  | 0.7710  |
| Memory problems            | -0.38   | -0.06 – 0.14  | 0.3515  | 6.19   | -5.07 – 17.44  | 0.2803  | 0.98     | -1.42 – 3.38  | 0.4227  | 0.79     | -2.40 – 3.98  | 0.6267  | -0.39     | -2.90 – 2.11  | 0.7582  |
| Depression (PHQ-9)         | 0.04    | -0.06 – 0.14  | 0.4846  | 1.51   | 0.12 – 2.90    | 0.0332  | 0.23     | -0.07 – 0.53  | 0.1370  | 0.48     | 0.08 – 0.89   | 0.0191  | 0.32      | 0.01 – 0.64   | 0.0442  |
| Mental HRQOL (VR-12)       | 0.03    | -0.00 – 0.06  | 0.1391  | 0.57   | 0.07 – 1.07    | 0.0266  | 0.14     | 0.03 – 0.25   | 0.0113  | 0.13     | -0.01 – 0.28  | 0.0702  | 0.08      | -0.04 – 0.19  | 0.1764  |
| PTSD (IES-R)               | -0.18   | -0.42 – 0.07  | 0.1509  | -3.76  | -7.14 – 0.38   | 0.0292  | -0.57    | -1.29 – 0.16  | 0.1249  | -0.69    | -1.65 – 0.28  | 0.1635  | -0.62     | -1.38 – 0.13  | 0.1061  |
| Disturbance of smell       | -0.04   | -0.78 – 0.69  | 0.9096  | -2.65  | -12.91 – 7.61  | 0.6122  | 0.71     | -1.48 – 2.90  | 0.5237  | 1.32     | -1.59 – 4.23  | 0.3731  | 2.35      | 0.06 – 4.63   | 0.0441  |

|                      |       |              |        |       |                |        |      |              |        |       |              |        |       |              |        |
|----------------------|-------|--------------|--------|-------|----------------|--------|------|--------------|--------|-------|--------------|--------|-------|--------------|--------|
| Disturbance of taste | 0.24  | -0.55 – 1.03 | 0.5496 | 2.12  | -8.90 – 13.14  | 0.7052 | 0.12 | -2.23 – 2.48 | 0.9174 | -1.50 | -4.63 – 1.63 | 0.3457 | -1.19 | -3.65 – 1.27 | 0.3411 |
| Headache             | 0.16  | -0.47 – 0.80 | 0.6132 | 0.07  | -8.72 – 8.86   | 0.9873 | 1.01 | -0.88 – 2.90 | 0.2926 | 1.56  | -0.95 – 4.07 | 0.2217 | 1.14  | -0.83 – 3.11 | 0.2551 |
| Vertigo              | 0.47  | -0.42 – 1.37 | 0.3004 | -2.09 | -14.56 – 10.39 | 0.7424 | 0.57 | -2.11 – 3.24 | 0.6780 | -0.83 | -4.39 – 2.73 | 0.6478 | -1.92 | -4.72 – 0.87 | 0.1772 |
| Sleep problems       | -0.04 | -0.70 – 0.61 | 0.8999 | -4.35 | -13.45 – 4.74  | 0.3469 | 0.96 | -0.99 – 2.92 | 0.33   | 0.01  | -2.59 – 2.61 | 0.9959 | 1.15  | -0.89 – 3.20 | 0.2669 |

WAIS-IV: Wechsler Adult Intelligence Scale; RWT: Regensburger Wortflüssigkeitstest (verbal fluency); SCWT: Stroop Color and Word Test - word (W), color (C), color – words (CW); CI: Confidence interval; PHQ-9: Patient Health Questionnaire; HRQOL: Health-related quality of life; VR-12: Veterans RAND 12-Item Health Survey, Mental Summary Scale; PTSD: Post-traumatic Stress Disorder; IES-R: Impact of Event Scale revised.
