# Supplementary material for: Subjective and Objective Cognitive Impairments in Non-Hospitalized Persons 9 Months after SARS-CoV-2 Infection
Source: MDPI journal article supplement (doi:10.3390/v15010256), 2023-01-16
Supplement: s1 [file s1]

**Table S4:** Multivariable logistic regression models for the dependent variables concentration problems and memory problems (with acute symptoms as covariables)

| Variable                                  | Ref.      | Concentration problems |              |         | Memory problems |              |         |
|-------------------------------------------|-----------|------------------------|--------------|---------|-----------------|--------------|---------|
|                                           |           | OR                     | 95% CI       | p-value | OR              | 95% CI       | p-value |
| Age                                       |           | 0.96                   | 0.94 – 0.99  | 0.0077  | 0.99            | 0.96 – 1.01  | 0.2803  |
| Female sex                                | male      | 0.90                   | 0.41 – 1.98  | 0.7953  | 0.83            | 0.40 – 1.72  | 0.6070  |
| School education ≤ 9 years                | > 9 years | 1.88                   | 0.68 – 5.19  | 0.2234  | 1.43            | 0.55 – 3.71  | 0.4639  |
| Follow-up time                            |           | 1.00                   | 0.89 – 1.13  | 0.9666  | 1.07            | 0.96 – 1.20  | 0.2397  |
| Sum of complaints                         |           | 1.50                   | 1.32 – 1.70  | <.0001  | 1.27            | 1.16 – 1.40  | <.0001  |
| Concentration problems <sup>1</sup> (yes) | no        | 14.94                  | 5.62 – 39.74 | <.0001  | -               | -            | -       |
| Memory problems <sup>1</sup> (yes)        | no        | -                      | -            | -       | 7.64            | 3.32 – 17.58 | <.0001  |
| Depression (PHQ-9)                        |           | 1.13                   | 0.98 – 1.29  | 0.0911  | 1.25            | 1.09 – 1.42  | 0.0012  |
| Mental HRQOL (VR-12)                      |           | 1.00                   | 0.94 – 1.04  | 0.6341  | 1.02            | 0.97 – 1.07  | 0.4470  |
| PTSD (IES-R)                              |           | 0.99                   | 0.70 – 1.41  | 0.9736  | 0.93            | 0.67 – 1.29  | 0.6635  |
| Disturbance of smell <sup>1</sup> (yes)   | no        | 0.95                   | 0.28 – 3.30  | 0.9382  | 0.77            | 0.25 – 2.36  | 0.6511  |
| Disturbance of taste <sup>1</sup> (yes)   | no        | 1.97                   | 0.56 – 6.92  | 0.2880  | 1.24            | 0.41 – 3.69  | 0.7060  |
| Headache <sup>1</sup> (yes)               | no        | 0.50                   | 0.19 – 1.31  | 0.1599  | 0.96            | 0.42 – 2.21  | 0.9240  |
| Vertigo <sup>1</sup> (yes)                | no        | 0.80                   | 0.36 – 1.77  | 0.5831  | 0.78            | 0.37 – 1.67  | 0.5259  |
| Sleep problems <sup>1</sup> (yes)         | no        | 0.70                   | 0.30 – 1.61  | 0.4010  | 0.77            | 0.36 – 1.67  | 0.5122  |

OR: Odds Ratio; CI: Confidence interval

PHQ-9: Patient Health Questionnaire; HRQOL: Health-related quality of life; VR-12: Veterans RAND 12-Item Health Survey, Mental Summary Scale; PTSD: Post-traumatic Stress Disorder; IES-R: Impact of Event Scale revised

<sup>1</sup>acute COVID-19 phase
